# Supplementary material
Source: Springer Nature journal article supplement (https://www.springermedizin.de/resource/supplementary/12979_2008_52_MOESM3_ESM.pdf/9603286)

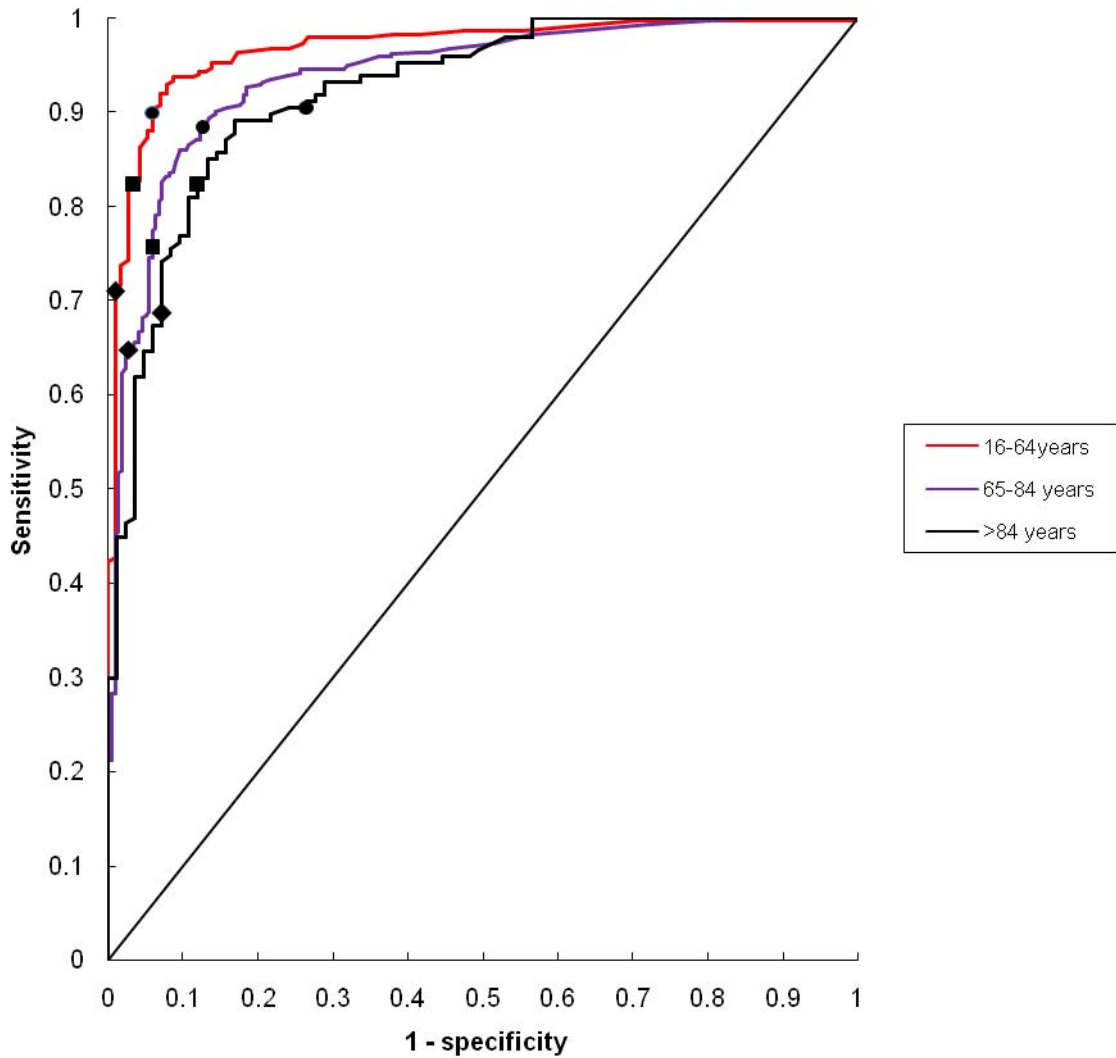

Supplement: MOESM3 [file 9603286]
